# Supplementary material for: Residues of Deltamethrin in Pine Needles and Pine Nuts of Catalonia (Spain)
Source: MDPI journal article supplement (doi:10.3390/molecules28248050), 2023-12-12
Supplement: s1 [file s1]

## **Supplementary material**

### **Development of an analytical method based on QuEChERS and GC-ECD for the determination of deltamethrin residue in pine needles and pine nuts**

Marina Bellot<sup>1</sup>, Anna Teixidó<sup>2</sup>, Antoni Torrell<sup>3</sup>, Neus Aletà<sup>4</sup>, Cristian Gómez-Canela<sup>1\*</sup>

**Table S1.** Residues quantified on pine needle samples at different intervals of time after an aerial application of Deltamethrin (0,2 L/ha) in Arenys d'Empordà (Girona-Spain) in 2021's crop season.

| Treatments            | Sample code | Time     | Weight (g) | Deltamethrin ( $\mu\text{g kg}^{-1}$ ) |
|-----------------------|-------------|----------|------------|----------------------------------------|
| Non treated area (NT) | M1          | 7 days   | 5.0178     | 23.8                                   |
|                       |             | 15 days  | 5.1405     | < 20 (< LOQ)                           |
|                       |             | 9 months | 5.0272     | < 20 (< LOQ)                           |
|                       | M2          | 7 days   | 5.1276     | < 20 (< LOQ)                           |
|                       |             | 15 days  | 5.1578     | < 20 (< LOQ)                           |
|                       |             | 9 months | 4.9785     | < 20 (< LOQ)                           |
|                       | M3          | 7 days   | 5.1822     | < 20 (< LOQ)                           |
|                       |             | 15 days  | 4.9993     | < 20 (< LOQ)                           |
|                       |             | 9 months | 5.0450     | < 20 (< LOQ)                           |
| Treated area (TR)     | M6          | 7 days   | 5.0605     | 239.6                                  |
|                       |             | 15 days  | 5.0299     | 102.0                                  |
|                       |             | 30 days  | 5.0690     | 80.5                                   |
|                       |             | 9 months | 5.0860     | < 20 (< LOQ)                           |
|                       | M7          | 7 days   | 5.0163     | 170.9                                  |
|                       |             | 15 days  | 5.1503     | 59.2                                   |
|                       |             | 30 days  | 5.0313     | 45.6                                   |
|                       |             | 9 months | 4.9571     | < 20 (< LOQ)                           |
|                       | M8          | 7 days   | 4.9640     | 244.1                                  |
|                       |             | 15 days  | 5.0971     | 43.9                                   |
|                       |             | 30 days  | 5.0629     | 39.6                                   |
|                       |             | 9 months | 4.9934     | 54.0                                   |

**Table S2.** Residues quantified on pine needle samples at different intervals of time after an aerial application of Deltamethrin (0,2 l/ha) in Arenys d'Empordà (Girona-Spain) in 2022's crop season.

| Treatment             | Sample code | Time     | Weight (g) | Deltamethrin ( $\mu\text{g kg}^{-1}$ ) |
|-----------------------|-------------|----------|------------|----------------------------------------|
| Non treated area (NT) | M1          | 7 days   | 4.6737     | < 20 (< LOQ)                           |
|                       |             | 15 days  | 5.0201     | < 20 (< LOQ)                           |
|                       |             | 9 months | 4.9960     | < 20 (< LOQ)                           |
|                       | M2          | 7 days   | 5.0262     | < 20 (< LOQ)                           |
|                       |             | 15 days  | 5.0063     | < 20 (< LOQ)                           |
|                       |             | 9 months | 5.0740     | < 20 (< LOQ)                           |
|                       | M3          | 7 days   | 4.7130     | < 20 (< LOQ)                           |
|                       |             | 15 days  | 5.0582     | < 20 (< LOQ)                           |
|                       |             | 9 months | 4.9748     | < 20 (< LOQ)                           |
|                       | M4          | 7 days   | 5.0047     | < 20 (< LOQ)                           |
|                       |             | 15 days  | 4.9880     | < 20 (< LOQ)                           |
|                       |             | 9 months | 5.0290     | < 20 (< LOQ)                           |
|                       | M5          | 7 days   | 4.9941     | < 20 (< LOQ)                           |
|                       |             | 15 days  | 5.0131     | < 20 (< LOQ)                           |
|                       |             | 9 months | 5.04273    | < 20 (< LOQ)                           |
| Treated area (TR)     | M6          | 7 days   | 5.0227     | 271.8                                  |
|                       |             | 15 days  | 4.9866     | 144.5                                  |
|                       |             | 30 days  | 5.0582     | 80.1                                   |
|                       |             | 45 days  | 5.0226     | 36.7                                   |
|                       |             | 60 days  | 4.9663     | 70.6                                   |
|                       |             | 9 months | 5.0374     | 52.6                                   |
|                       | M7          | 7 days   | 5.0044     | 213.9                                  |
|                       |             | 15 days  | 4.9911     | 131.2                                  |
|                       |             | 30 days  | 5.0060     | 95.0                                   |
|                       |             | 45 days  | 5.0175     | 89.0                                   |
|                       |             | 60 days  | 5.0096     | 34.9                                   |
|                       |             | 9 months | 5.0842     | < 20 (< LOQ)                           |
|                       | M8          | 7 days   | 5.0213     | 213.9                                  |
|                       |             | 15 days  | 4.9912     | 101.0                                  |
|                       |             | 30 days  | 5.0066     | 69.8                                   |
|                       |             | 45 days  | 5.0173     | 26.7                                   |
|                       |             | 60 days  | 5.0048     | 31.9                                   |
|                       |             | 9 months | 5.0699     | < 20 (< LOQ)                           |

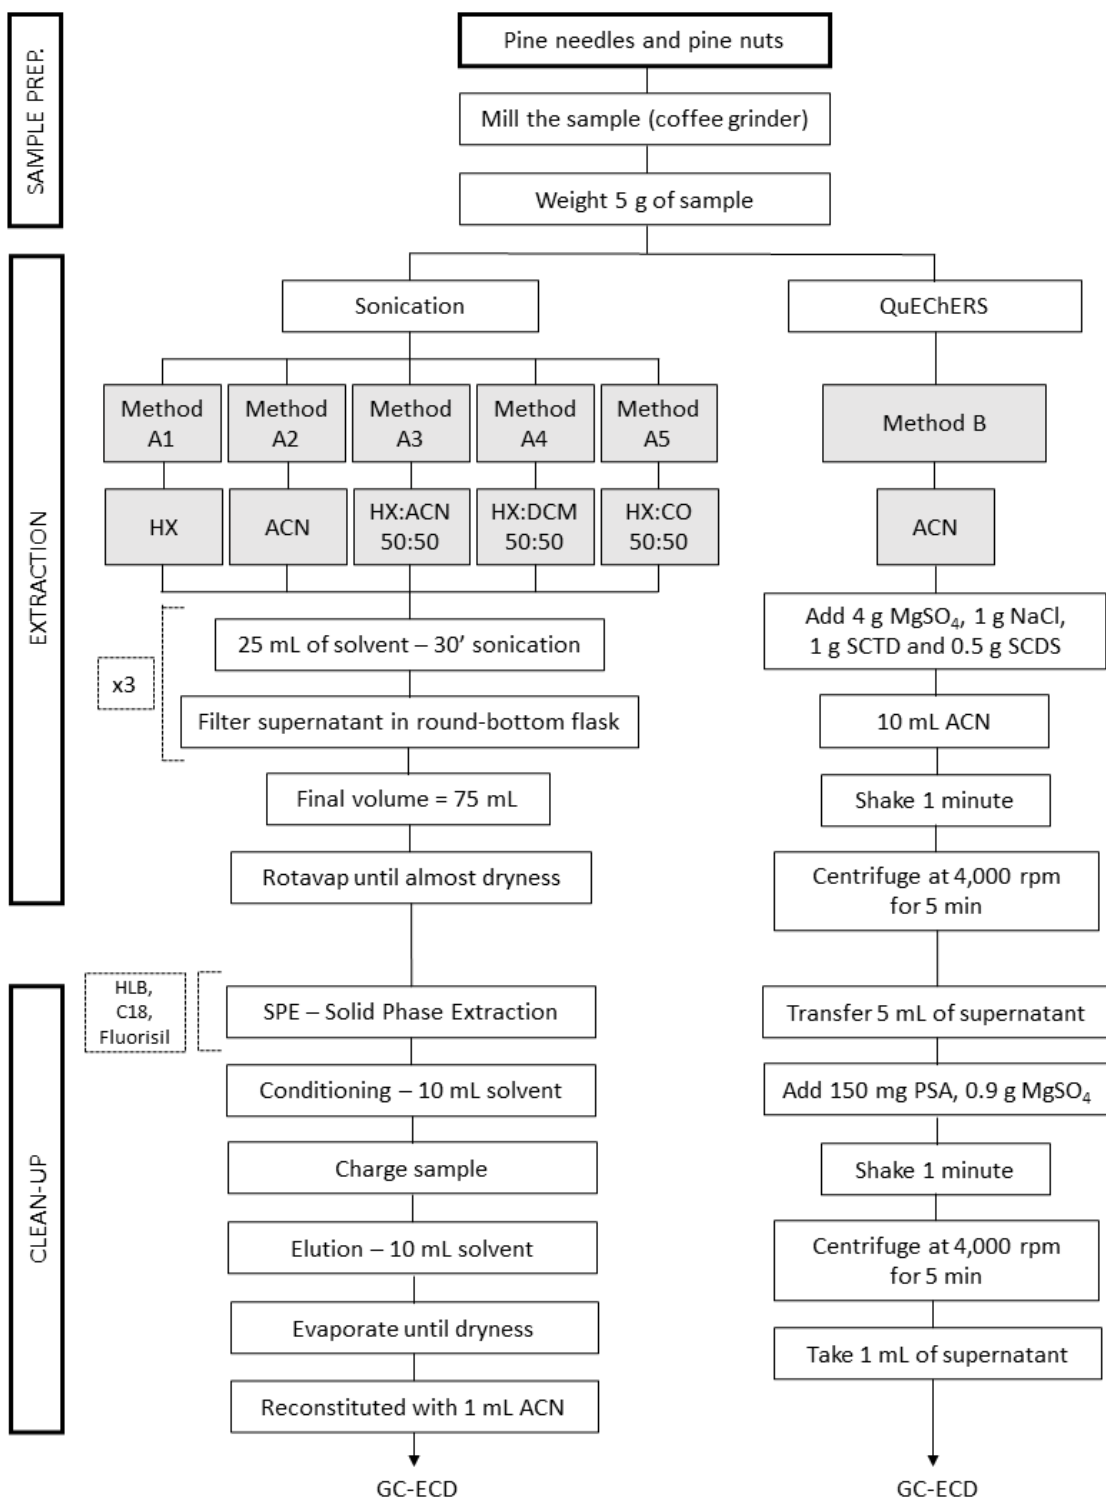

**Figure S1.** Detailed steps of the extraction and clean-up procedures under study.

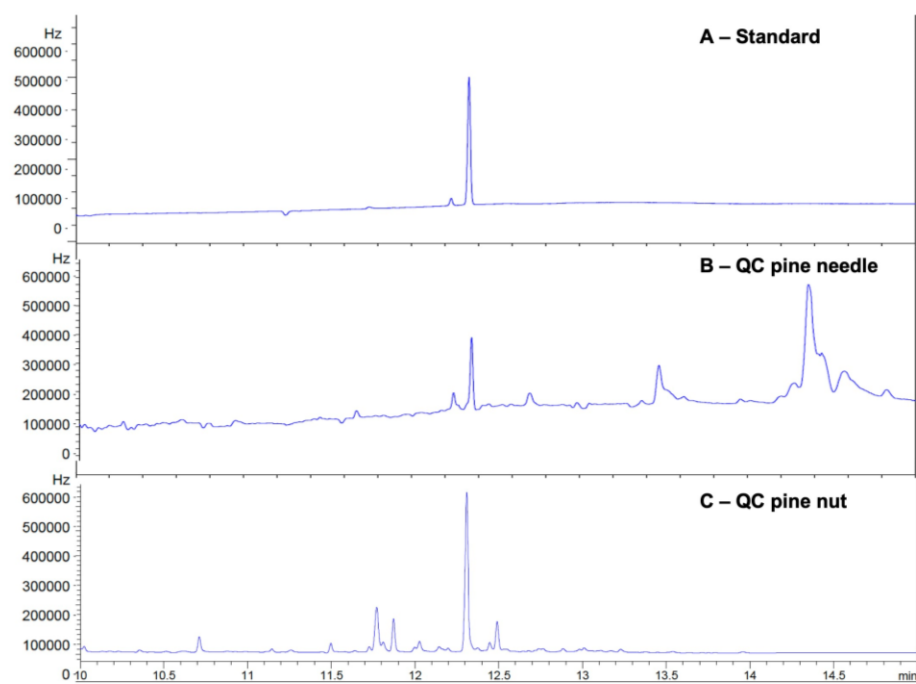

**Figure S2.** GC-ECD chromatogram of an standard at  $20 \mu\text{g kg}^{-1}$  (A), an a QC of pine needle at  $20 \mu\text{g kg}^{-1}$  (B) and pine nuts at  $20 \mu\text{g kg}^{-1}$  (C).
